# Supplementary material for: Selenocatalytic α-halogenation
Source: Royal Society of Chemistry journal article supplement (doi:10.1039/b410576a), 2004-01-01

## Selenocatalytic $\alpha$ -Halogenation

Chao Wang and Jon Tunge

**Supporting Information:**  $^1\text{H}$  and  $^{13}\text{C}$  NMR spectra of all products.

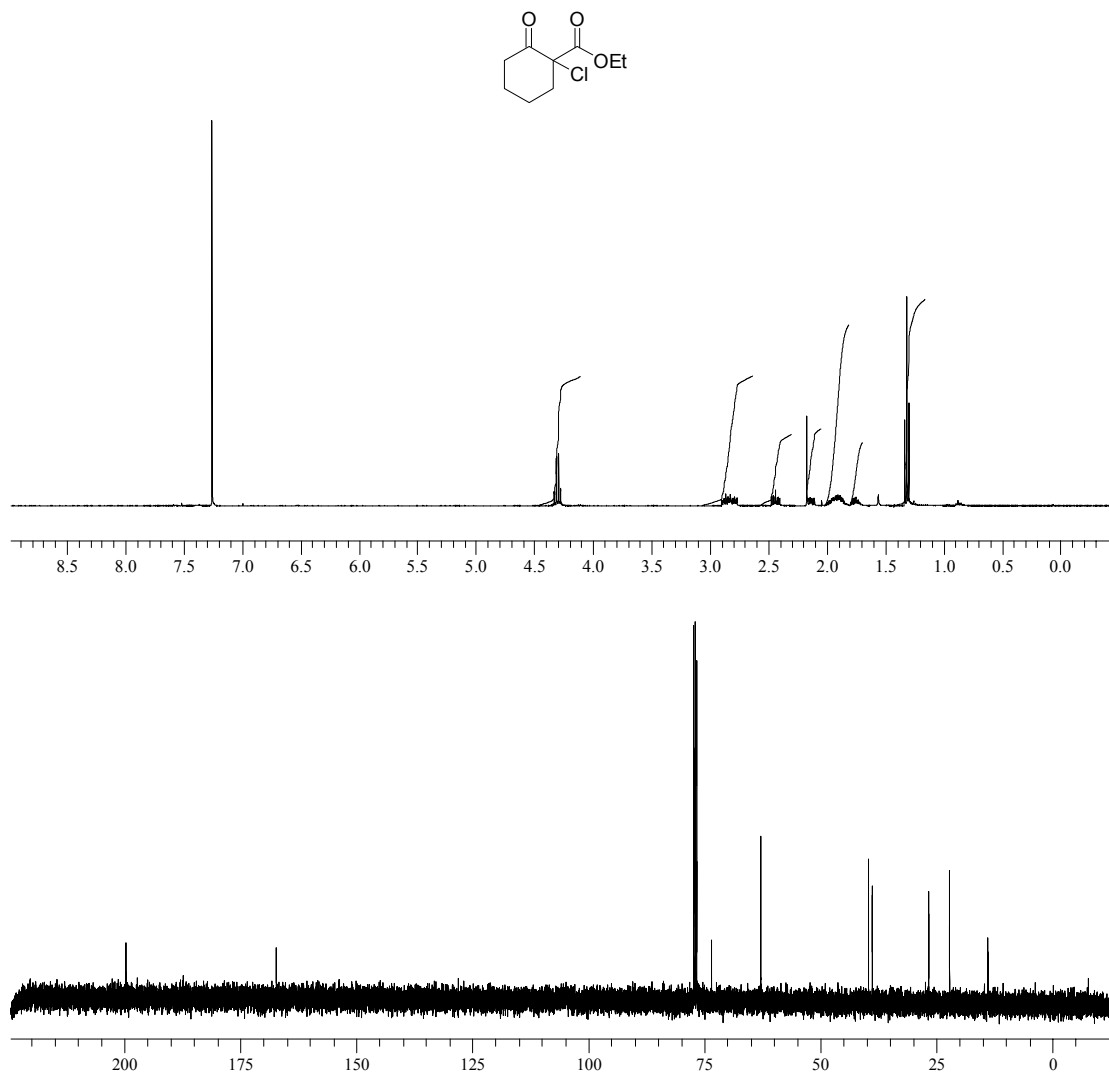

**3a:**  $^1\text{H}$  oil:  $^1\text{H}$  NMR (400 MHz,  $\text{CDCl}_3$ )  $\delta$  4.30 (q,  $J = 7.1$  Hz, 2H:  $\text{OCH}_2$ ), 2.83 (m, 2H:  $\text{ClCCH}_2$ ), 2.45 (m, 1H:  $\text{CH}_2$ ), 2.14 (m, 1H:  $\text{CH}_2$ ), 2.01-1.82 (m, 3H:  $\text{CH}_2$ ), 1.75 (m, 1H:  $\text{CH}_2$ ), 1.31 (t,  $J = 7.1$  Hz, 3H:  $\text{CH}_3$ );  $^{13}\text{C}$  NMR (75 MHz,  $\text{CDCl}_3$ )  $\delta$  199.67 (C=O), 167.22 (OC=O), 73.47 (ClC), 66.82 (OCH<sub>2</sub>), 39.60 (C=OCH<sub>2</sub>), 38.82 (2.83) (CH<sub>2</sub>), 26.67 (ambiguous CH<sub>2</sub>), 22.14 (ambiguous CH<sub>2</sub>), 13.87 (CH<sub>3</sub>).

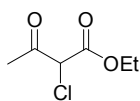

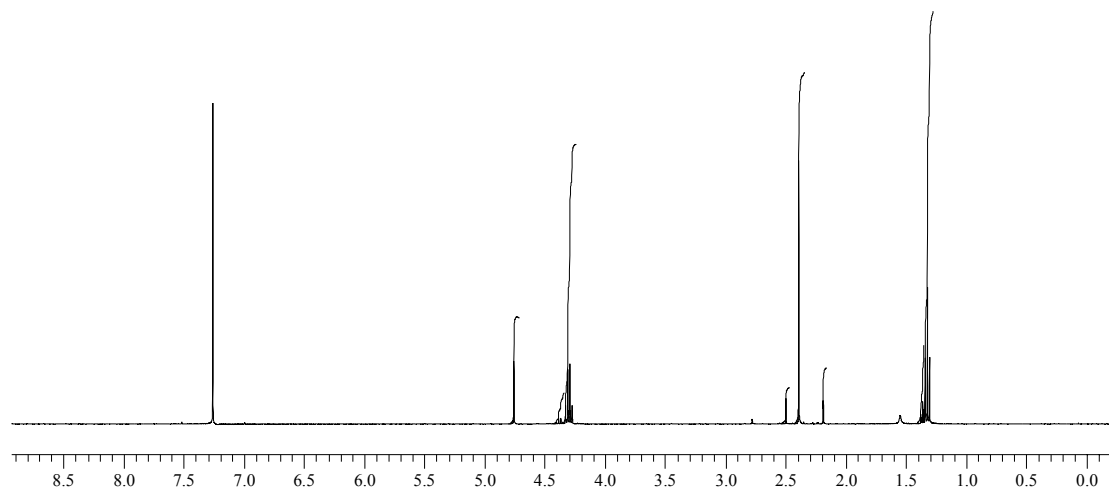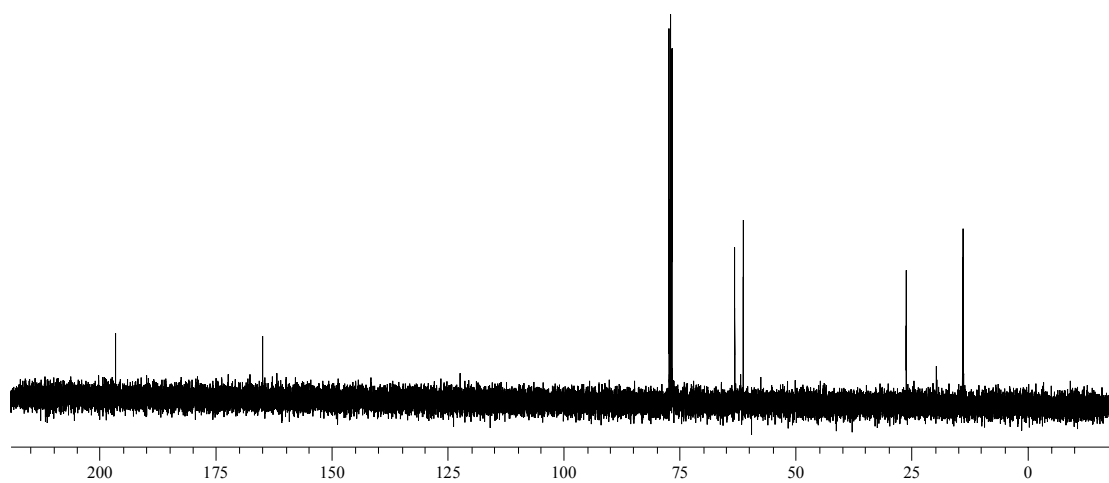

**3b:** oil:  $^1\text{H}$  NMR (400 MHz,  $\text{CDCl}_3$ )  $\delta$  4.76 (s, 1H: ClCH), 4.30 (q,  $J = 7.1$  Hz, 2H:  $\text{OCH}_2$ ), 2.39 (s, 3H:  $\text{CH}_3\text{C}=\text{O}$ ), 1.32 (t,  $J = 7.1$  Hz, 3H:  $\text{CH}_3$ );  $^{13}\text{C}$  NMR (75 MHz,  $\text{CDCl}_3$ )  $\delta$  199.61 (C=O), 164.92 (OC=O), 63.14 (ClC), 61.31 ( $\text{OCH}_2$ ), 26.21 ( $\text{O}=\text{CCH}_3$ ), 13.89 ( $\text{CH}_3$ ).

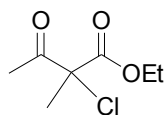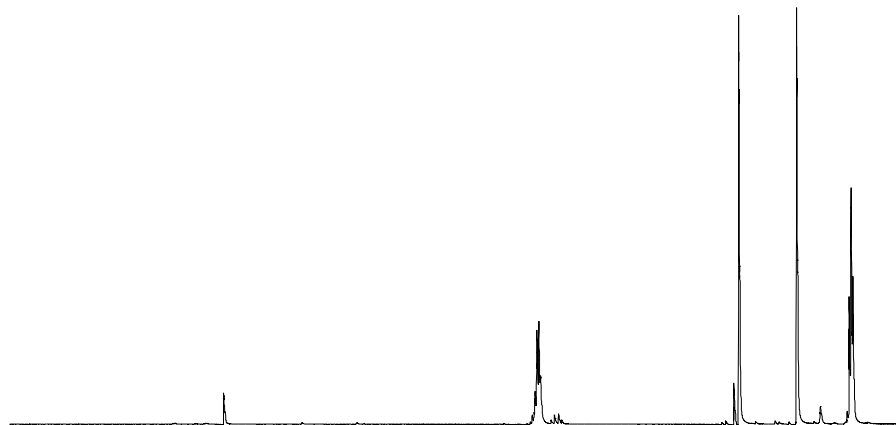

Supplement: b410576a.pdf [file b410576a.pdf]
